# Supplementary material for: Comparison between free light chains and immunofixation electrophoresis: one-year data from a tertiary hospital
Source: publisher site journal article supplement (doi:10.1515/tjb-2024-0202), 2025-07-24
Supplement: Supplementary file 1 [file j_tjb-2024-0202_suppl_001.docx]

**Supplementary materials for the manuscript**

**Supplementary Table 1:** The age distribution of different paraprotein band types in males.

| **MALE** | **AGE (YEARS)** | | | | | | | |
| --- | --- | --- | --- | --- | --- | --- | --- | --- |
| **TYPE** | **20-29** | **30-39** | **40-49** | **50-59** | **60-69** | **70-79** | **80-89** | **90-99** |
| Free λ Monoclonal |  | 1 |  |  | 4 | 2 | 2 |  |
| Free κ Monoclonal |  |  | 1 | 1 | 1 | 2 |  |  |
| lgG-λ Monoclonal |  |  |  | 1 | 3 | 4 | 1 | 1 |
| lgG-κ Monoclonal |  | 1 |  | 3 | 6 | 3 | 1 |  |
| lgA-λ Monoclonal |  |  | 1 | 1 | 2 | 1 | 1 |  |
| lgA-κ Monoclonal |  |  |  |  | 4 | 2 |  |  |
| lgM-λ Monoclonal |  |  |  | 2 |  | 1 |  |  |
| lgM-κ Monoclonal |  |  |  |  | 1 | 1 |  |  |
| Biclonal Bands |  | 1 |  | 2 | 3 | 2 |  |  |
| Triclonal Bands |  |  |  |  |  |  |  |  |
| **TOTAL** | **0** | **3** | **2** | **10** | **24** | **18** | **5** | **1** |

**Supplementary Table 2:** The age distribution of different paraprotein band types in females.

| **FEMALE** | **AGE (YEARS)** | | | | | | | |
| --- | --- | --- | --- | --- | --- | --- | --- | --- |
| **TYPE** | **20-29** | **30-39** | **40-49** | **50-59** | **60-69** | **70-79** | **80-89** | **90-99** |
| Free λ Monoclonal | 1 | 2 | 1 | 3 | 1 | 3 |  |  |
| Free κ Monoclonal |  |  |  |  | 2 | 1 |  |  |
| lgG-λ Monoclonal |  |  | 2 | 2 | 4 | 2 | 1 |  |
| lgG-κ Monoclonal |  |  |  | 2 | 5 | 3 |  |  |
| lgA-λ Monoclonal |  |  |  |  |  | 3 |  |  |
| lgA-κ Monoclonal |  |  |  |  | 2 | 2 | 1 |  |
| lgM-λ Monoclonal |  |  |  |  |  |  |  |  |
| lgM-κ Monoclonal |  |  |  | 1 |  |  |  |  |
| Biclonal Bands |  |  |  |  | 2 | 2 | 2 |  |
| Triclonal Bands |  |  | 1 |  | 1 | 1 |  |  |
| **TOTAL** | **1** | **2** | **4** | **8** | **17** | **17** | **4** | **0** |

**Supplementary Table 3:** Clinical diagnoses and IFE results for all patients.

| **DIAGNOSIS** | **IFE NEGATIVE** | **IFE POSITIVE** |
| --- | --- | --- |
| Anemia | 118 | 13 |
| Abnormal Results of Kidney Function Studies | 45 | 8 |
| Enlarged Lymph Nodes | 27 | 2 |
| General Medical Examination | 91 | 7 |
| Chronic Renal Failure | 34 | 4 |
| Leukocyte Disorders | 100 | 15 |
| Multiple Myeloma | 4 | 7 |
| Splenomegaly | 33 | 3 |
| Thrombocytopenia | 77 | 7 |
| Vitamin D Deficiency | 323 | 15 |
| Other | 265 | 33 |
| **TOTAL** | 1117 | 114 |

**Supplementary Table 4:** IFE status of all patients, categorized by their admitting clinical departments.

| **CLINICS** | **IFE NEGATIVE** | **IFE POSITIVE** |
| --- | --- | --- |
| Hematology | 491 | 64 |
| Internal Medicine | 141 | 18 |
| Nephrology | 109 | 15 |
| Neurology | 333 | 9 |
| Other | 43 | 10 |
| **TOTAL** | **1117** | **116** |

**Supplementary Table 5:** Kappa-lambda (κ/λ) ratio status (normal/abnormal) for patients stratified by their IFE positivity.

| **IFE STATUS** | **Normal  κ/λ Ratio** | **Abnormal κ/λ Ratio** | **TOTAL κ/λ Ratio** |
| --- | --- | --- | --- |
| **Positive** | 58 | 29 | 87 |
| **Negative** | 566 | 30 | 596 |

**Supplementary Table 6:** Serum kappa FLC status (normal/abnormal) for patients stratified by the presence or absence of kappa M-protein.

| **Serum Kappa FLC Results** | **Patients With Kappa M-Protein** | **Patients Without Kappa M-Protein** |
| --- | --- | --- |
| **Abnormal** | 16 | 27 |
| **Normal** | 16 | 569 |
| **TOTAL** | 32 | 596 |

**Supplementary Table 7:** Serum lambda FLC status (normal/abnormal) for patients stratified by the presence or absence of lambda M-protein.

| **Serum Lambda FLC Results** | **Patients With Lambda M-Protein** | **Patients Without Lambda M-Protein** |
| --- | --- | --- |
| **Abnormal** | 13 | 3 |
| **Normal** | 32 | 593 |
| **TOTAL** | 45 | 596 |
